# Supplementary material
Source: PubMed Central journal article supplement (PMC1859914)
Supplement: pnas_0607171103_3.pdf [file pnas_0607171103_3.pdf]

Program: ERRAT2

Chain#:1

Overall quality factor\*\*: 85.075

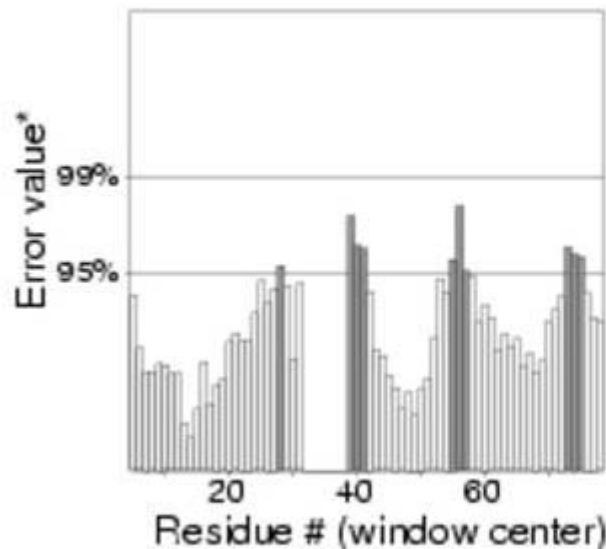

\*On the error axis, two lines are drawn to indicate the confidence with which it is possible to reject regions that exceed that error value.

\*\* Expressed as the percentage of the protein for which the calculated error value falls below the 95% rejection limit. Good high resolution structures generally produce values around 95% or higher. For lower resolutions (2.5 to 3Å) the average overall quality factor is around 91%.
